# Supplementary material for: Association between Social Support and Healthy Aging in Older Japanese: The Ohsaki Cohort 2006 Study
Source: Research Square preprint supplement (doi:10.21203/rs.3.rs-1752482/v1), 2022-07-01
Supplement: Supplementary file 1 [file 3dc1f4510c23354c3eef807d.xlsx]

## Sheet: Table3
Table 3
Association between the answer to each question regarding social support and healthy aging (n=8,232)
	Social support
	No	Yes
Q1 “Do you have someone to consult when you are in trouble?”
Number of healthy aging / Number of participants (%)	31 / 618 (5.0)	589 / 7,614 (7.7)
Model 1a	1.00 (Reference)c	1.75 (1.20-2.55)
Model 2b	1.00 (Reference)	1.65 (1.12-2.41)
Q2 “Do you have someone to talk about your health when you are in bad physical condition?”
Number of healthy aging / Number of participants (%)	22 / 387 (5.7)	598 / 7,845 (7.6)
Model 1	1.00 (Reference)	1.59 (1.02-2.49)
Model 2	1.00 (Reference)	1.51 (0.96-2.37)
Q3 “Do you have someone to ask to help with your daily housework?”
Number of healthy aging / Number of participants (%)	46 / 971 (4.7)	574 / 7,261 (7.9)
Model 1	1.00 (Reference)	1.88 (1.38-2.57)
Model 2	1.00 (Reference)	1.79 (1.31-2.45)
Q4 “Do you have someone to ask to take you to a hospital when you are sick?”
Number of healthy aging / Number of participants (%)	27 / 479 (5.6)	593 / 7,753 (7.7)
Model 1	1.00 (Reference)	1.43 (0.96-2.15)
Model 2	1.00 (Reference)	1.40 (0.93-2.11)
Q5 “Do you have someone to ask to take care of you when you are in bed with bad physical condition?”
Number of healthy aging / Number of participants (%)	41 / 858 (4.8)	579 / 7,374 (7.9)
Model 1	1.00 (Reference)	1.69 (1.22-2.36)
Model 2	1.00 (Reference)	1.61 (1.15-2.25)
b Adjusted for the same covariates as Model 2 in Table 2
c Odds ratio (95% confidence interval) was calculated by multiple logistic regression model.
